# Supplementary figures and images for: Interchangeable SF3B1 inhibitors interfere with pre-mRNA splicing at multiple stages
Source: PubMed Central journal article supplement — RNA. 2016 Mar;22(3):350–9. doi: 10.1261/rna.053108.115 (PMC4748813; doi:10.1261/rna.053108.115), 2016-03

**A****28 nt PYT**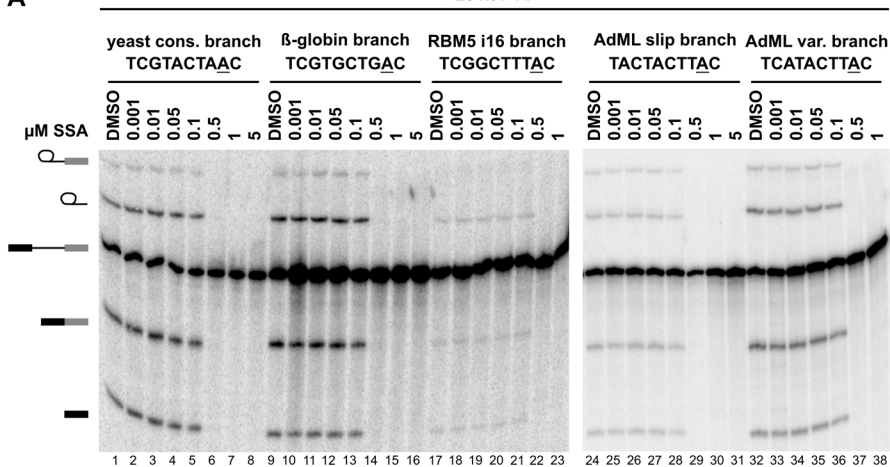**B****28 nt PYT**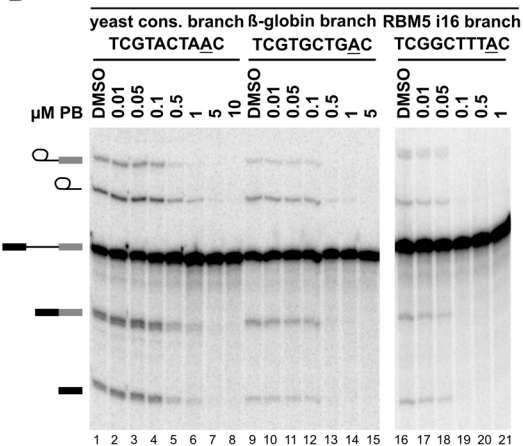**C****yeast consensus branch**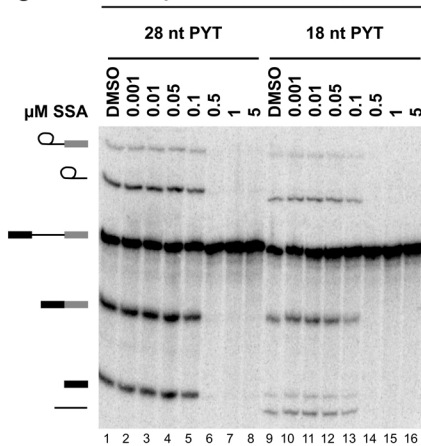

Supplement: supp_053108.115_S1_Fig.pdf [file supp_053108.115_S1_Fig.pdf]

**A**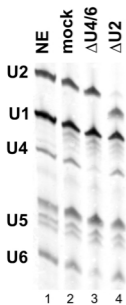**B**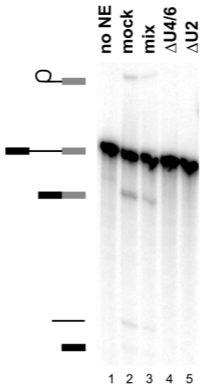**C**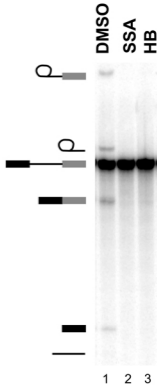

Supplement: supp_053108.115_S2_Fig.pdf [file supp_053108.115_S2_Fig.pdf]

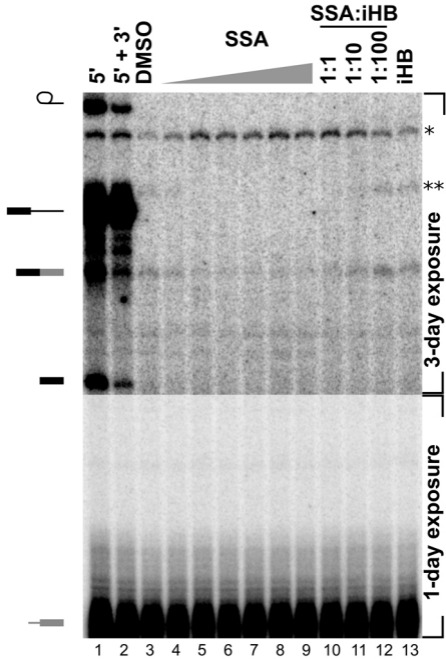

Supplement: supp_053108.115_S3_Fig.pdf [file supp_053108.115_S3_Fig.pdf]
